# Supplementary material
Source: PubMed Central journal article supplement (PMC2753227)

Supplementary Figure 1. CA dinucleotide distribution in the region -100 to +40 and mononucleotide distribution for 83 parental genes (a and c) and 65 retrogenes (b and d) with annotated 5' UTRs.

(a)

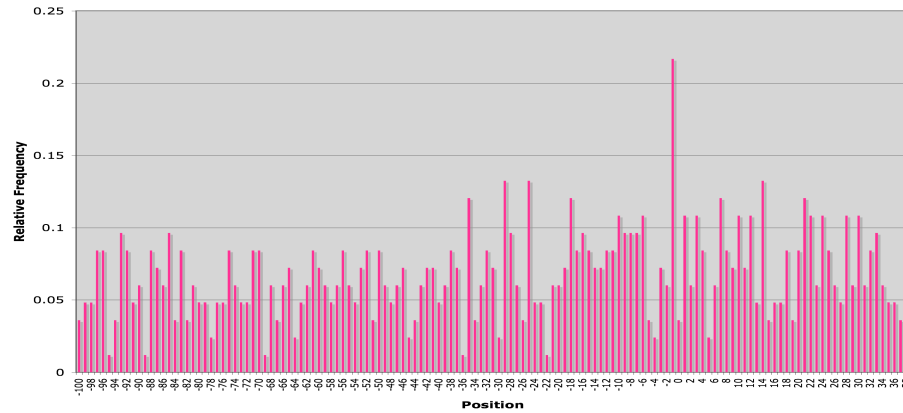

(c)

The distribution of mononucleotides occurred in each 20 bp bin across the region -2000 ~ +99 of 83 annotated parental genes in *Drosophila melanogaster*

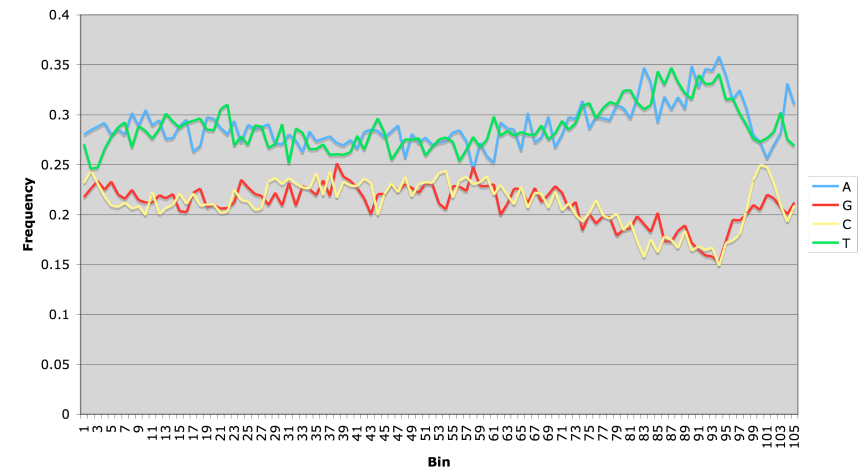

(b)

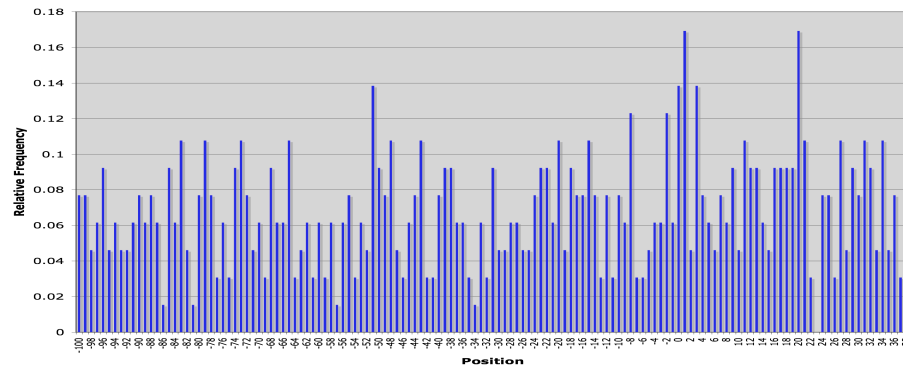

(d)

The distribution of mononucleotides occurred in each 20 bp bin across the region -2000 ~ +99 of 65 annotated retrogenes in *Drosophila melanogaster*

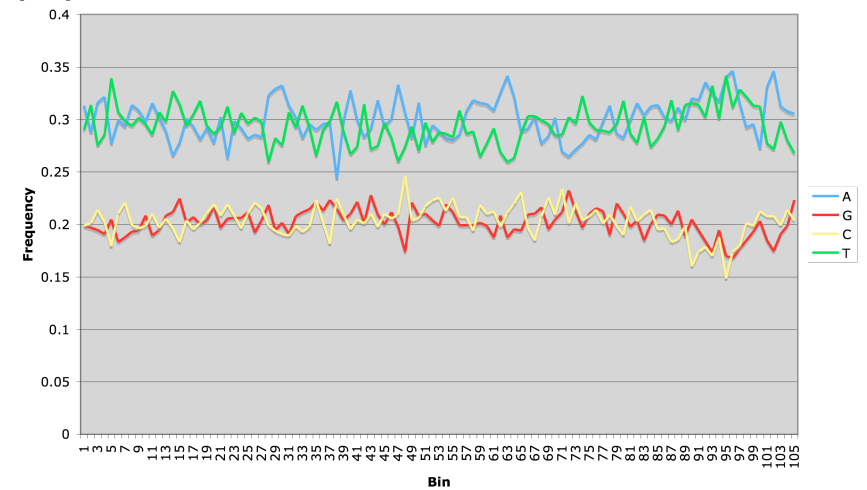

Supplement: NIHMS87250-supplement-01.pdf [file NIHMS87250-supplement-01.pdf]
