# Supplementary material
Source: PubMed Central journal article supplement (PMC2753227)
Supplement: NIHMS87250-supplement-03.pdf [file NIHMS87250-supplement-03.pdf]

Supplementary Table 3. Characteristics of the GCT motif. Gene name, motif distance from the TSS and putative conservation of orthologous GCT motifs in other *Drosophila* species are shown.

| GCT motif logo                                                                    | Gene           | GCT motif pattern | GCT motif location <sup>a</sup> | Conservation in other species |
|-----------------------------------------------------------------------------------|----------------|-------------------|---------------------------------|-------------------------------|
|  | <i>CG9582</i>  | TGGCTTTT          | -49                             | All <i>Drosophila</i> species |
|                                                                                   | <i>CG11401</i> | TGGCTTTT          | -17                             | <i>melanogaster</i> subgroup  |
|                                                                                   | <i>CG7094</i>  | TGGCTTTT          | -42                             | <i>Sophophora</i> subgenus    |
|                                                                                   | <i>CG4264</i>  | TGGCTTTG          | -11                             | only <i>D. melanogaster</i>   |
|                                                                                   | <i>CG9518</i>  | TGGCTTTT          | -36                             | <i>melanogaster</i> group     |
|                                                                                   | <i>CG2577</i>  | TGGCTTTG          | -65                             | only <i>D. melanogaster</i>   |
|                                                                                   | <i>CG14508</i> | CGGCTTTG          | -36                             | <i>melanogaster</i> group     |

<sup>a</sup> “-” sign indicates that the upstream region beyond the Transcription Start Site (TSS)
