# Supplementary material
Source: PubMed Central journal article supplement (PMC2753227)
Supplement: NIHMS87250-supplement-04.pdf [file NIHMS87250-supplement-04.pdf]

Supplementary Table 3. Characteristic of the two testis associated motifs TA1 and TA2 and their associated retrogenes. gene name, strand orientation, start position, P value as calculated by MEME, and expression information for the gene are given. Start position is reported in bold when the motif is part of a most conserved region as annotated in the UCSC Genome Browser. CDS: motif hits within a coding region.

| Motif Logo                                                                         | Gene Name      | Strand      | Start Location (Based on the TSS) | P value  | cDNA/EST hits                       |
|------------------------------------------------------------------------------------|----------------|-------------|-----------------------------------|----------|-------------------------------------|
|    | <i>CG17268</i> | -           | <b>-269</b> CDS                   | 3.04E-07 | AT LP                               |
|                                                                                    | <i>CG4264</i>  | +           | <b>-964</b>                       | 4.51E-07 | RH GM LD AT SD GH LP RE EN          |
|                                                                                    | <i>CG9582</i>  | -           | -386                              | 4.51E-07 | AT                                  |
|                                                                                    | <i>CG18290</i> | +           | <b>-799</b>                       | 5.73E-07 | RE AT LP RH GH EC LD HL GM EK       |
|                                                                                    | <i>CG17645</i> | +           | <b>81</b> CDS                     | 7.17E-07 | GH AT                               |
|                                                                                    | <i>CG31003</i> | -           | -438                              | 1.16E-06 | AT GH                               |
|                                                                                    | <i>CG7768</i>  | +           | <b>-694</b>                       | 1.16E-06 | GM AT EC                            |
|                                                                                    | <i>CG5648</i>  | +           | -853                              | 1.32E-06 | AT                                  |
|                                                                                    | <i>CG7542</i>  | +           | -833 CDS                          | 1.41E-06 | AT                                  |
|                                                                                    | <i>CG4264</i>  | +           | 1622 CDS                          | 1.74E-06 | RH GM LD AT SD GH LP RE EN          |
|                                                                                    | <i>CG6255</i>  | -           | -388                              | 1.86E-06 | GH AT UT                            |
|                                                                                    | <i>CG2830</i>  | -           | <b>113</b> CDS                    | 2.23E-06 | GH AT                               |
|                                                                                    | <i>CG5409</i>  | +           | <b>-696</b>                       | 2.52E-06 | EC AT                               |
|                                                                                    | <i>CG4264</i>  | +           | <b>1741</b> CDS                   | 2.52E-06 | RH GM LD AT SD GH LP RE EN          |
|                                                                                    | <i>CG9582</i>  | +           | <b>-555</b>                       | 2.93E-06 | AT                                  |
|                                                                                    | <i>CG9573</i>  | +           | -34                               | 3.08E-06 | RE AT LP GH                         |
|                                                                                    | <i>CG14508</i> | +           | <b>-562</b>                       | 3.33E-06 | AT                                  |
| <i>CG4701</i>                                                                      | -              | <b>-722</b> | 7.37E-06                          | AT       |                                     |
|  | <i>CG31003</i> | +           | <b>-372</b>                       | 6.83E-08 | AT GH                               |
|                                                                                    | <i>CG6050</i>  | -           | <b>-683</b>                       | 6.83E-08 | RH GM AT SD LP UT RE GH LD EK CK    |
|                                                                                    | <i>CG17268</i> | +           | <b>-282</b> CDS                   | 4.45E-07 | AT LP                               |
|                                                                                    | <i>CG16988</i> | -           | <b>-772</b> CDS                   | 4.45E-07 | LD AT EK                            |
|                                                                                    | <i>CG12334</i> | +           | -397                              | 4.45E-07 | AT EK EC                            |
|                                                                                    | <i>CG9582</i>  | -           | 68 CDS                            | 4.45E-07 | AT                                  |
|                                                                                    | <i>CG9436</i>  | +           | <b>102</b>                        | 4.90E-07 | LD AT SD RH RE GH EN EK             |
|                                                                                    | <i>CG4706</i>  | -           | <b>-449</b>                       | 9.47E-07 | AT                                  |
|                                                                                    | <i>CG2830</i>  | +           | <b>-243</b>                       | 1.05E-06 | GH AT                               |
|                                                                                    | <i>CG2512</i>  | -           | -901                              | 3.14E-06 | SD AT LD GH LP UT GM RH RE HL EK EC |
